# Supplementary material for: MoS2 nanosheet/TiO2 nanowire hybrid nanostructures for enhanced visible-light photocatalytic activities
Source: Royal Society of Chemistry journal article supplement (doi:10.1039/c4cc07351g), 2014-01-01
Supplement: c4cc07351g1.pdf [file c4cc07351g1.pdf]

## **MoS<sub>2</sub> nanosheet/TiO<sub>2</sub> nanowire hybrid nanostructures for enhanced visible-light photocatalytic activities**

Meng Shen,<sup>a</sup> Zhiping Yan,<sup>a</sup> Lei Yang,<sup>a</sup> Pingwu Du,<sup>\*a</sup> Jingyu Zhang,<sup>b</sup> Bin Xiang<sup>\*a</sup>

<sup>a</sup>Department of Materials Science & Engineering, CAS key Laboratory of Materials for Energy Conversion, University of Science and Technology of China, Hefei, Anhui, 230026, China.

<sup>b</sup>Molecular Foundry, Lawrence Berkeley National Laboratory, 1 Cyclotron Rd, Berkeley, CA 94720, USA.

\* To whom correspondence should be addressed. [binxiang@ustc.edu.cn](mailto:binxiang@ustc.edu.cn); [dupingwu@ustc.edu.cn](mailto:dupingwu@ustc.edu.cn)

## Experimental details

**Synthesis of TiO<sub>2</sub> wires:** The TiO<sub>2</sub> nanowires were synthesized by electrospinning with the following steps (schematic illustration of the setup seen in Figure S1). Tetra-n-butyl titanate was dissolved in 3ml acetic acid (HAc) and 3 ml ethanol, stirring for 30 min. 0.45 g PVP(Aldrich, Mw ~1300 000) dissolved in 7.5 ml ethanol, stirring for 12 hours, followed by mixing two solution and stirring for some time. The mixture was transformed to a plastic syringe with stainless steel needle. Then the solution was driven by a syringe pump at the rate of 1.0 mL•h<sup>-1</sup>. The needle was supplied 18 kV by a high voltage supply which can provided voltage of up to 30 kV. A flat aluminum foil was spaced 15 cm away from the needle to collect nanowires. To obtain pure TiO<sub>2</sub> nanowires, the electrospun fiber was calcined at two steps: first pre-oxidized at 280 °C with heating rate of 3 °C /min in air for 1 hour, then oxidized at 500 °C with heating rate of 5°C/min in air for 1h.

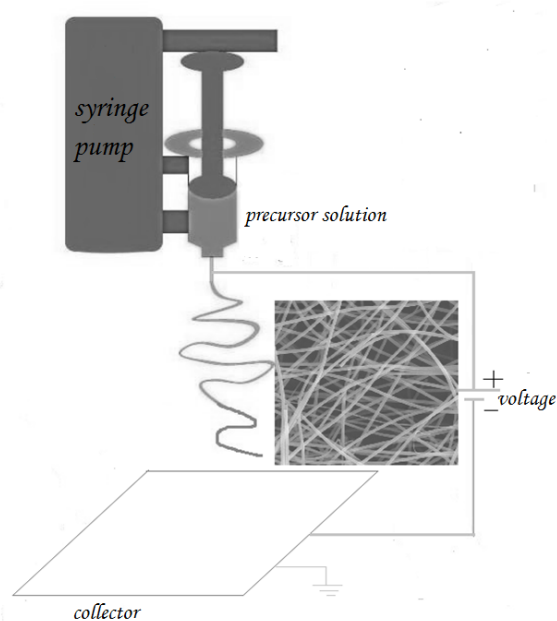

Figure S1 Schematic illustration of the setup for electrospinning.

**Synthesis of pure multilayered MoS<sub>2</sub> nanosheets:** Layered MoS<sub>2</sub> nanosheets were synthesized by a hydrothermal method. 3 mmol of MoO<sub>3</sub> powder and 9mmol of KSCN powder were dissolved in 80 ml of distilled water. Then we set the pH value to 2 by 0.1 M hydrochloric acid (HCl). After transferred into 100 ml Teflon-lined stainless steel autoclave, it was heated to 240 °C and kept it for 24 hours. After the autoclave was cooled down to room temperature, we washed the black precipitate with distilled water and ethanol. Then we dried it at 60 °C for 12 hours. Finally, MoS<sub>2</sub> nanosheets were successfully synthesized and the morphology is demonstrated by SEM as shown in Figure S2.

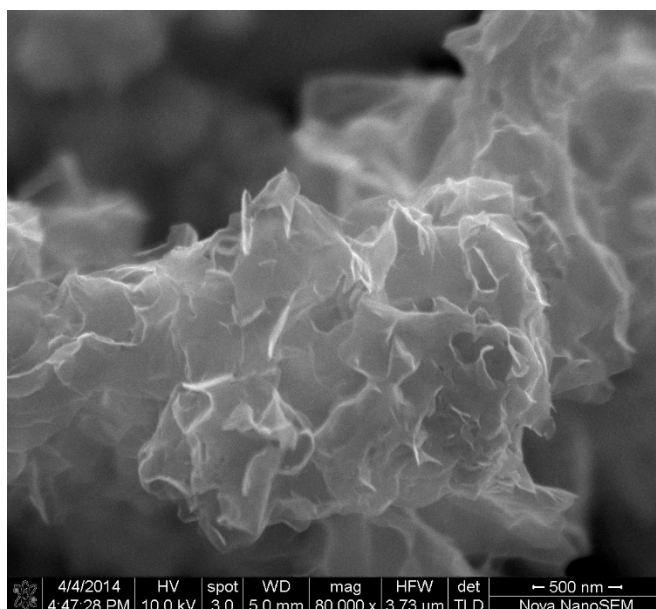

Figure S2. The SEM image of pure multilayered MoS<sub>2</sub> nanosheets synthesized by a hydrothermal method.

**Synthesis of MoS<sub>2</sub> nanosheet/TiO<sub>2</sub> nanowire hybrid nanostructure:** Layered MoS<sub>2</sub> nanosheet/TiO<sub>2</sub> wire hybrid nanostructures were synthesized by a hydrothermal method. 3 mmol of MoO<sub>3</sub> powder and 9 mmol of KSCN powder were dissolved in 80ml of distilled water. Then we set the pH value to 2 by 0.1 M hydrochloric acid (HCl). 3mmol of pure TiO<sub>2</sub> nanowires was added into the solution, then stirred for 0.5 hour. After transferred into 100 ml Teflon-lined stainless steel

autoclave, it was heated to 240 °C and kept it for 24 hours. After the autoclave was cooled down to room temperature, we washed the black precipitate with distilled water and ethanol. Then we dried it at 60 °C for 12 hours. Finally, MoS<sub>2</sub> nanosheet/TiO<sub>2</sub> nanowire hybrid nanostructures were successfully synthesized.

**Structure and property characterization:** The morphology of as-synthesized structures was observed by SEM (JSM-6700F, JEOL). XRD (MXPAHF, Mac Science Co. Ltd., Japan) was used to characterize the structure with Cu K $\alpha$  radiation. HRTEM (JEM-2010, JEOL) was used to study the microstructures. UV-vis absorption spectra were obtained by a UV-vis spectrophotometer (SOLID 3700, Shimadzu). The specific surface area was measured by American Micromeritics Instrument Corporation TriStar II 3020M system.

### **Photocatalytic hydrogen production**

The photocatalytic hydrogen production experiments were performed in a 50 mL flask at ambient temperature using a 300 W Xe lamp equipped with UV cut off filter ( $\lambda > 420$  nm). Hydrogen gas was measured by gas chromatography (SP-6890, nitrogen as a carrier gas) equipped with thermal conductivity detector (TCD). All the experiments were performed taking 1.0 mg of MoS<sub>2</sub>/TiO<sub>2</sub> hybrid structure powder and 3.5 mg of Eosin Y dye suspended by magnetic stirring in 20 mL of TEOA-H<sub>2</sub>O solution (5 %, v/v), with a pH of 9. Prior to irradiation, the system was deaerated by bubbling nitrogen for 15 min to remove air. After that, 5 mL of methane was added to serve as the internal standard. During the photocatalytic reaction, the reactor was tightly sealed to avoid a gas exchange.

Different photocatalytic hydrogen evolution rate under visible light illumination catalyzed by different photo co-catalysts in 20 mL of 5% (v/v) TEOA aqueous solution (pH = 9) under visible

light irradiation ( $\lambda > 420$  nm) shown in Figure 3. The loading amount of EY and photo co-catalyst is 3.5 mg and 1.0 mg respectively. The highest hydrogen evolution rate ( $\sim 16.7$  mmol  $\cdot$  h<sup>-1</sup>  $\cdot$  g<sup>-1</sup>) is achieved in the 1D MoS<sub>2</sub> nanosheet/TiO<sub>2</sub> nanowire hybrid nanostructures.
